# Supplementary material for: Healthy Ageing Is Associated with Preserved or Enhanced Nutrient and Mineral Apparent Digestibility in Dogs and Cats Fed Commercially Relevant Extruded Diets
Source: MDPI journal article supplement (doi:10.3390/ani11072127), 2021-07-17
Supplement: s1 [file s1]

## Supplementary Material: Table S1

**Table S1.** Coefficient of variation (CV) in dogs from the same breed, gender, or from the same breed and gender (inter-animal variability) for body weight (BW, kg), daily energy intake (kcal/kgBW<sup>0.75</sup>), crude protein (CP), fat, total dietary fibre (TDF), calcium (Ca), and phosphorus (P) apparent digestibility

| CV (%)                              | Apparent digestibility (%) |               |             |             |              |             |             |
|-------------------------------------|----------------------------|---------------|-------------|-------------|--------------|-------------|-------------|
|                                     | BW                         | Energy intake | CP          | Fat         | TDF          | Ca          | P           |
| Beagle (female + male)              | 17.4                       | 17.4          | 3.30        | 2.30        | 84.7         | 96.9        | 46.8        |
| Brittany (female + male)            | 20.9                       | 15.6          | 2.45        | 2.05        | 59.3         | 53.8        | 33.2        |
| <b>Mean CV (gender differences)</b> | <b>19.2</b>                | <b>16.6</b>   | <b>2.88</b> | <b>2.18</b> | <b>72.01</b> | <b>75.4</b> | <b>40.0</b> |
| Females (Beagle + Brittany)         | 22.0                       | 16.2          | 2.90        | 2.17        | 84.6         | 97.0        | 42.4        |
| Males (Beagle + Brittany)           | 27.6                       | 22.2          | 3.86        | 2.56        | 63.8         | 62.7        | 42.6        |
| <b>Mean CV (breed differences)</b>  | <b>24.8</b>                | <b>19.2</b>   | <b>3.38</b> | <b>2.36</b> | <b>74.2</b>  | <b>79.9</b> | <b>42.5</b> |
| Beagle/Female                       | 14.6                       | 16.1          | 2.85        | 2.16        | 85.7         | 101         | 42.8        |
| Beagle/Male                         | 17.4                       | 20.2          | 4.44        | 2.81        | 66.9         | 64.1        | 45.1        |
| Brittany/Female                     | 15.1                       | 14.1          | 3.05        | 2.40        | 67.2         | 50.6        | 35.2        |
| Brittany/Male                       | 24.3                       | 4.01          | 2.21        | 1.94        | 58.1         | 57.4        | 33.8        |
| <b>Mean CV (inter-animal)</b>       | <b>17.8</b>                | <b>13.6</b>   | <b>3.14</b> | <b>2.33</b> | <b>69.5</b>  | <b>68.3</b> | <b>39.3</b> |
