# Supplementary material for: Healthy Ageing Is Associated with Preserved or Enhanced Nutrient and Mineral Apparent Digestibility in Dogs and Cats Fed Commercially Relevant Extruded Diets
Source: MDPI journal article supplement (doi:10.3390/ani11072127), 2021-07-17
Supplement: s1 [file s1]

Supplementary Material: Figure S2

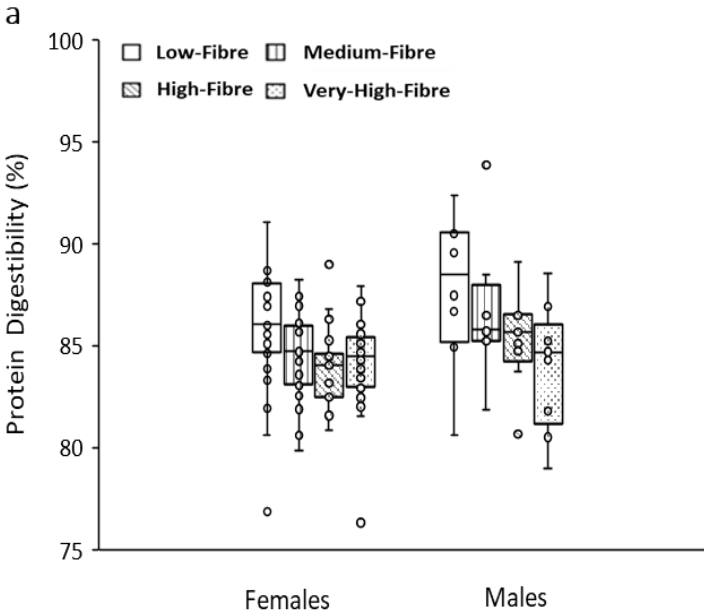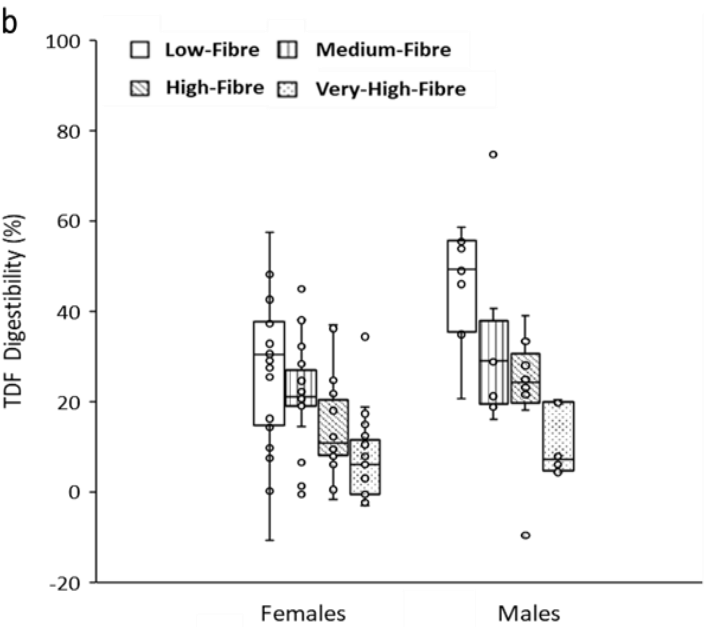

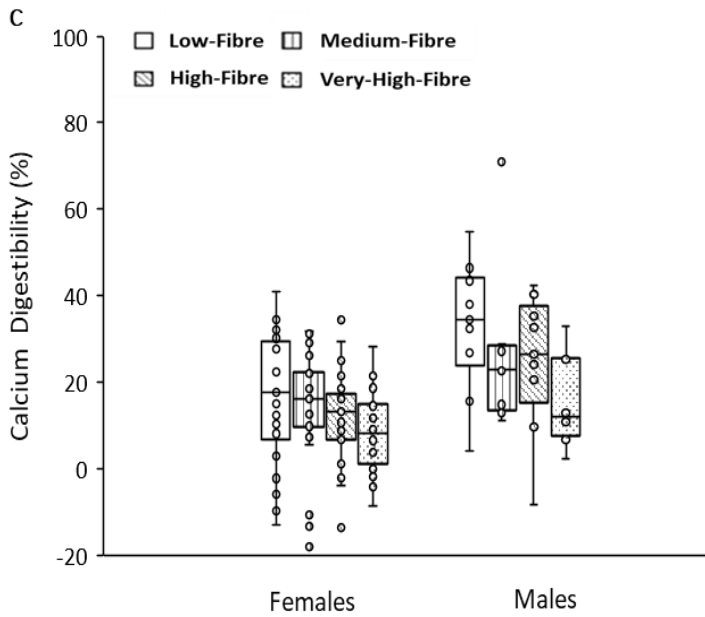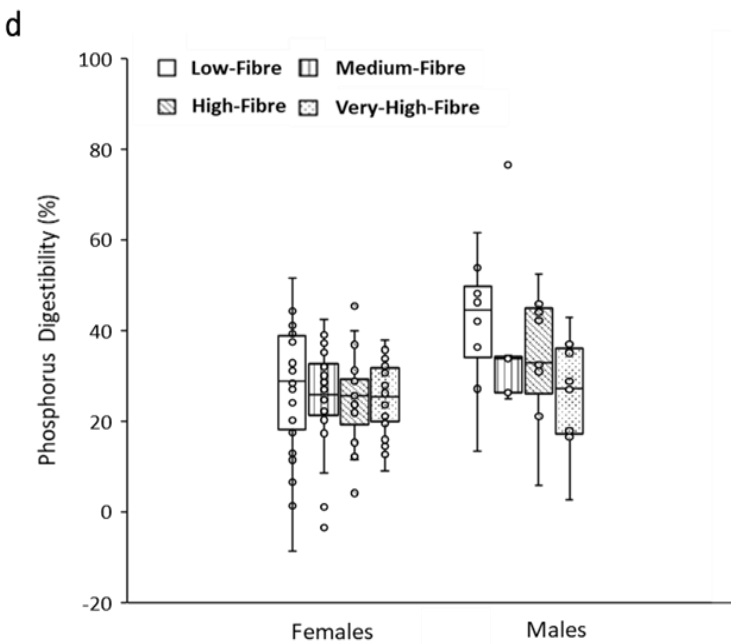

**Figure S2.** Apparent digestibility (%) of (a) crude protein; (b) total dietary fibre (TDF); (c) calcium; and (d) phosphorus in female (n= 27) and male (n= 10) dogs across four diets with varying levels of crude fibre and total dietary fibre
